# Supplementary material
Source: MDPI journal article supplement (https://www.mdpi.com/2313-433X/8/8/220)
Supplement: s1 [file s1]

## Supplementary Materials

**Supplementary Table S1.** First-order texture features that showed a statistically significant difference between the study groups

| Image type                      | Feature name                   | Chronic pancreatitis | Health          | p     | q     |
|---------------------------------|--------------------------------|----------------------|-----------------|-------|-------|
| Intensity discretized (FBN 16)  | Kurtosis                       | 2.87 ± 0.46          | 3.26 ± 0.54     | 0.039 | 0.044 |
|                                 | Energy (10 <sup>8</sup> )      | 9.09 ± 6.09          | 14.27 ± 7.25    | 0.043 | 0.044 |
|                                 | 10 <sup>th</sup> percentile    | 68.51 ± 20.69        | 111.98 ± 46.92  | 0.004 | 0.015 |
| Intensity discretized (FBN 128) | Kurtosis                       | 2.87 ± 0.46          | 3.26 ± 0.54     | 0.039 | 0.044 |
|                                 | Energy (10 <sup>8</sup> )      | 9.09 ± 6.09          | 14.27 ± 7.25    | 0.043 | 0.044 |
|                                 | 10 <sup>th</sup> percentile    | 68.51 ± 20.69        | 111.98 ± 46.92  | 0.004 | 0.015 |
| Intensity discretized (FBW 6)   | Kurtosis                       | 2.87 ± 0.46          | 3.26 ± 0.54     | 0.039 | 0.044 |
|                                 | Energy (10 <sup>8</sup> )      | 9.09 ± 6.09          | 14.27 ± 7.25    | 0.043 | 0.044 |
|                                 | 10 <sup>th</sup> percentile    | 68.51 ± 20.69        | 111.98 ± 46.92  | 0.004 | 0.015 |
| Intensity discretized (FBW 42)  | Kurtosis                       | 2.87 ± 0.46          | 3.26 ± 0.54     | 0.039 | 0.044 |
|                                 | Energy (10 <sup>8</sup> )      | 9.09 ± 6.09          | 14.27 ± 7.25    | 0.043 | 0.044 |
|                                 | 10 <sup>th</sup> percentile    | 68.51 ± 20.69        | 111.98 ± 46.92  | 0.004 | 0.015 |
| 2 mm $\sigma$ LoG filter        | Mean                           | 1.26 ± 5.92          | -4.93 ± 7.73    | 0.020 | 0.035 |
|                                 | Kurtosis                       | 3.11 ± 0.39          | 3.78 ± 0.91     | 0.017 | 0.035 |
|                                 | 90 <sup>th</sup> percentile    | 58.74 ± 12.47        | 43.56 ± 17.98   | 0.013 | 0.032 |
|                                 | Interquartile range            | 58.61 ± 12.82        | 47.63 ± 15.29   | 0.042 | 0.044 |
|                                 | Robust mean absolute deviation | 24.37 ± 5.24         | 19.99 ± 6.26    | 0.048 | 0.048 |
|                                 |                                |                      |                 |       |       |
| 5 mm $\sigma$ LoG filter        | Mean                           | 0.27 ± 11.71         | -15.05 ± 16.57  | 0.007 | 0.021 |
|                                 | Median                         | 1.84 ± 11.74         | -15.37 ± 17.68  | 0.004 | 0.015 |
|                                 | 90 <sup>th</sup> percentile    | 37.79 ± 9.74         | 22.93 ± 13.61   | 0.002 | 0.015 |
| Logarithm filter                | Entropy                        | 7.79 ± 0.28          | 7.42 ± 0.37     | 0.005 | 0.017 |
|                                 | Uniformity                     | 0.0056 ± 0.0013      | 0.0078 ± 0.0023 | 0.004 | 0.015 |
|                                 | Skewness                       | -2.92 ± 0.41         | -3.53 ± 0.88    | 0.024 | 0.038 |
|                                 | Kurtosis                       | 16.61 ± 3.61         | 26.67 ± 12.72   | 0.009 | 0.024 |
|                                 | Interquartile range            | 97.22 ± 46.63        | 62.82 ± 26.63   | 0.019 | 0.035 |
|                                 | Mean absolute deviation        | 73.59 ± 35.34        | 48.53 ± 18.21   | 0.021 | 0.035 |
|                                 | Robust mean absolute deviation | 42.57 ± 20.38        | 27.42 ± 11.44   | 0.018 | 0.035 |

*Footnotes:* Data are presented as mean ± standard error. q value represents the minimum false discovery rate at which a result can be considered significant.

*Abbreviations:* FBN, fixed bin number; FBW, fixed bin width.

**Supplementary Table S2.** GLCM texture features that showed a statistically significant difference between the study groups

| Image type                      | Feature name                         | Chronic pancreatitis | Health          | p     | q     |
|---------------------------------|--------------------------------------|----------------------|-----------------|-------|-------|
| Intensity discretized (FBN 16)  | Contrast                             | 8.24 ± 2.09          | 6.43 ± 2.44     | 0.038 | 0.046 |
|                                 | Correlation                          | 0.39 ± 0.06          | 0.48 ± 0.09     | 0.008 | 0.037 |
|                                 | Autocorrelation                      | 46.05 ± 15.64        | 62.23 ± 21.05   | 0.024 | 0.045 |
|                                 | Sum average                          | 12.98 ± 2.33         | 15.17 ± 2.85    | 0.029 | 0.045 |
|                                 | Joint average                        | 6.49 ± 1.17          | 7.59 ± 1.43     | 0.029 | 0.045 |
|                                 | Inverse variance                     | 0.37 ± 0.03          | 0.39 ± 0.04     | 0.037 | 0.046 |
|                                 | Inverse difference                   | 0.47 ± 0.04          | 0.52 ± 0.07     | 0.028 | 0.045 |
|                                 | Difference average                   | 2.09 ± 0.32          | 1.78 ± 0.43     | 0.029 | 0.045 |
|                                 | Difference entropy                   | 2.59 ± 0.18          | 2.42 ± 0.28     | 0.045 | 0.047 |
|                                 | Inverse difference moment            | 0.39 ± 0.05          | 0.46 ± 0.08     | 0.028 | 0.045 |
|                                 | Maximal correlation coefficient      | 0.43 ± 0.08          | 0.51 ± 0.11     | 0.025 | 0.045 |
|                                 | Inverse difference normalized        | 0.89 ± 0.01          | 0.91 ± 0.02     | 0.028 | 0.045 |
|                                 | Inverse difference moment normalized | 0.97 ± 0.01          | 0.98 ± 0.01     | 0.035 | 0.046 |
|                                 | Information measure of correlation 1 | -0.08 ± 0.02         | -0.11 ± 0.05    | 0.040 | 0.047 |
|                                 | Information measure of correlation 2 | 0.49 ± 0.09          | 0.59 ± 0.12     | 0.018 | 0.045 |
| Intensity discretized (FBN 128) | Contrast                             | 520.32 ± 134.78      | 403.52 ± 158.98 | 0.039 | 0.046 |
|                                 | Correlation                          | 0.39 ± 0.07          | 0.48 ± 0.10     | 0.008 | 0.037 |
|                                 | Joint average                        | 48.38 ± 9.29         | 57.15 ± 11.42   | 0.029 | 0.045 |
|                                 | Sum average                          | 96.77 ± 18.59        | 114.29 ± 22.84  | 0.029 | 0.045 |
|                                 | Inverse variance                     | 0.07 ± 0.02          | 0.09 ± 0.03     | 0.028 | 0.045 |
|                                 | Difference average                   | 16.84 ± 2.53         | 14.29 ± 3.49    | 0.030 | 0.045 |
|                                 | Difference entropy                   | 5.41 ± 0.21          | 5.17 ± 0.37     | 0.042 | 0.047 |
|                                 | Autocorrelation (10 <sup>2</sup> )   | 25.93 ± 9.37         | 35.69 ± 12.69   | 0.024 | 0.045 |
|                                 | Inverse difference                   | 0.14 ± 0.02          | 0.17 ± 0.04     | 0.029 | 0.045 |
|                                 | Inverse difference moment            | 0.07 ± 0.02          | 0.09 ± 0.03     | 0.029 | 0.045 |
|                                 | Inverse difference normalized        | 0.89 ± 0.01          | 0.91 ± 0.02     | 0.029 | 0.045 |
|                                 | Inverse difference moment normalized | 0.97 ± 0.01          | 0.98 ± 0.01     | 0.036 | 0.046 |
| Intensity discretized (FBW 6)   | Correlation                          | 0.39 ± 0.07          | 0.48 ± 0.10     | 0.008 | 0.037 |
|                                 | Maximal correlation coefficient      | 0.45 ± 0.08          | 0.52 ± 0.11     | 0.047 | 0.047 |
|                                 | Inverse difference normalized        | 0.89 ± 0.01          | 0.91 ± 0.02     | 0.029 | 0.045 |
|                                 | Inverse difference moment normalized | 0.97 ± 0.01          | 0.98 ± 0.01     | 0.037 | 0.046 |
| Intensity discretized (FBW 42)  | Correlation                          | 0.39 ± 0.07          | 0.48 ± 0.10     | 0.007 | 0.037 |
|                                 | Maximal correlation coefficient      | 0.42 ± 0.08          | 0.49 ± 0.11     | 0.023 | 0.045 |
|                                 | Inverse difference normalized        | 0.89 ± 0.01          | 0.91 ± 0.02     | 0.030 | 0.045 |

|                          |                                      |                         |                        |       |       |
|--------------------------|--------------------------------------|-------------------------|------------------------|-------|-------|
| 2 mm $\sigma$ LoG filter | Inverse difference moment normalized | $0.97 \pm 0.01$         | $0.98 \pm 0.01$        | 0.038 | 0.046 |
|                          | Information measure of correlation 1 | $-0.09 \pm 0.02$        | $-0.12 \pm 0.05$       | 0.045 | 0.048 |
|                          | Information measure of correlation 2 | $0.49 \pm 0.09$         | $0.58 \pm 0.11$        | 0.014 | 0.045 |
|                          | Contrast ( $10^2$ )                  | $28.76 \pm 12.27$       | $19.89 \pm 10.76$      | 0.044 | 0.048 |
|                          | Correlation                          | $0.25 \pm 0.07$         | $0.33 \pm 0.07$        | 0.002 | 0.037 |
|                          | Inverse variance                     | $0.05 \pm 0.02$         | $0.06 \pm 0.02$        | 0.046 | 0.048 |
|                          | Inverse difference                   | $0.09 \pm 0.02$         | $0.11 \pm 0.03$        | 0.046 | 0.048 |
|                          | Difference average                   | $37.49 \pm 8.56$        | $30.33 \pm 9.01$       | 0.034 | 0.046 |
|                          | Difference entropy                   | $6.43 \pm 0.32$         | $6.14 \pm 0.44$        | 0.046 | 0.048 |
|                          | Inverse difference moment normalized | $0.05 \pm 0.02$         | $0.06 \pm 0.02$        | 0.048 | 0.048 |
|                          | Inverse difference normalized        | $0.90 \pm 0.01$         | $0.92 \pm 0.02$        | 0.012 | 0.045 |
|                          | Inverse difference moment normalized | $0.97 \pm 0.01$         | $0.99 \pm 0.01$        | 0.005 | 0.037 |
|                          | Information measure of correlation 1 | $-0.19 \pm 0.05$        | $-0.15 \pm 0.04$       | 0.020 | 0.045 |
|                          | Information measure of correlation 2 | $0.96 \pm 0.03$         | $0.92 \pm 0.05$        | 0.006 | 0.037 |
|                          | Correlation                          | $0.31 \pm 0.05$         | $0.39 \pm 0.11$        | 0.015 | 0.045 |
| Logarithm filter         | Joint energy                         | $0.000098 \pm 0.000044$ | $0.00015 \pm 0.000077$ | 0.034 | 0.046 |
|                          | Sum entropy                          | $8.84 \pm 0.54$         | $8.31 \pm 0.53$        | 0.012 | 0.045 |
|                          | Inverse variance                     | $0.03 \pm 0.02$         | $0.05 \pm 0.03$        | 0.004 | 0.037 |
|                          | Inverse difference                   | $0.067 \pm 0.018$       | $0.099 \pm 0.035$      | 0.004 | 0.037 |
|                          | Difference average                   | $72.07 \pm 32.75$       | $44.87 \pm 23.98$      | 0.015 | 0.045 |
|                          | Difference entropy                   | $7.35 \pm 0.55$         | $6.59 \pm 0.78$        | 0.004 | 0.037 |
|                          | Maximum probability                  | $0.00058 \pm 0.00019$   | $0.00081 \pm 0.00033$  | 0.039 | 0.046 |
|                          | Inverse difference moment normalized | $0.028 \pm 0.009$       | $0.048 \pm 0.022$      | 0.004 | 0.037 |
|                          | Inverse difference normalized        | $0.93 \pm 0.02$         | $0.95 \pm 0.03$        | 0.025 | 0.045 |
|                          | Information measure of correlation 1 | $-0.22 \pm 0.055$       | $-0.17 \pm 0.034$      | 0.006 | 0.037 |
|                          | Information measure of correlation 2 | $0.98 \pm 0.02$         | $0.95 \pm 0.03$        | 0.001 | 0.037 |
|                          |                                      |                         |                        |       |       |

*Footnotes:* Data are presented as mean  $\pm$  standard error. q value represents the minimum false discovery rate at which a result can be considered significant.

*Abbreviations:* FBN, fixed bin number; FBW, fixed bin width; GLCM, gray level co-occurrence matrix.

**Supplementary Table S3.** GLRLM texture features that showed a statistically significant difference between the study groups

| Image type                      | Feature name                                          | Chronic pancreatitis | Health         | p     | q     |
|---------------------------------|-------------------------------------------------------|----------------------|----------------|-------|-------|
| Intensity discretized (FBN 16)  | Run entropy                                           | 4.09 ± 0.11          | 4.21 ± 0.14    | 0.017 | 0.043 |
|                                 | Run variance                                          | 0.28 ± 0.11          | 0.48 ± 0.33    | 0.033 | 0.043 |
|                                 | Run percentage                                        | 0.86 ± 0.04          | 0.81 ± 0.06    | 0.022 | 0.043 |
|                                 | Long run emphasis                                     | 1.71 ± 0.25          | 2.12 ± 0.63    | 0.030 | 0.043 |
|                                 | Short run emphasis                                    | 0.89 ± 0.03          | 0.85 ± 0.04    | 0.022 | 0.043 |
|                                 | High gray level run emphasis                          | 47.38 ± 14.22        | 61.76 ± 18.27  | 0.023 | 0.043 |
|                                 | Low gray level run emphasis                           | 0.09 ± 0.03          | 0.06 ± 0.04    | 0.032 | 0.043 |
|                                 | Short run low gray level emphasis                     | 0.09 ± 0.03          | 0.06 ± 0.04    | 0.027 | 0.043 |
|                                 | Short run high gray level emphasis                    | 41.89 ± 12.51        | 52.22 ± 14.39  | 0.045 | 0.047 |
|                                 | Long run high gray level emphasis                     | 81.51 ± 26.09        | 136.19 ± 61.61 | 0.005 | 0.026 |
|                                 | Run length non uniformity normalized                  | 0.76 ± 0.05          | 0.71 ± 0.07    | 0.017 | 0.043 |
|                                 |                                                       |                      |                |       |       |
| Intensity discretized (FBN 128) | Run variance                                          | 0.02 ± 0.01          | 0.03 ± 0.01    | 0.026 | 0.043 |
|                                 | Run percentage                                        | 0.98 ± 0.01          | 0.97 ± 0.01    | 0.024 | 0.043 |
|                                 | Short run emphasis                                    | 0.99 ± 0.01          | 0.98 ± 0.01    | 0.023 | 0.043 |
|                                 | Long run emphasis                                     | 1.06 ± 0.02          | 1.08 ± 0.03    | 0.025 | 0.043 |
|                                 | High gray level run emphasis (10 <sup>2</sup> )       | 27.06 ± 8.83         | 35.85 ± 11.41  | 0.026 | 0.043 |
|                                 | Run length non uniformity normalized                  | 0.97 ± 0.01          | 0.95 ± 0.02    | 0.023 | 0.043 |
|                                 | Short run high gray level emphasis (10 <sup>2</sup> ) | 26.65 ± 8.69         | 35.09 ± 11.08  | 0.028 | 0.043 |
|                                 | Long run high gray level emphasis (10 <sup>2</sup> )  | 28.78 ± 9.44         | 39.13 ± 12.92  | 0.018 | 0.043 |
| Intensity discretized (FBW 6)   | Run variance                                          | 0.04 ± 0.01          | 0.05 ± 0.03    | 0.036 | 0.043 |
|                                 | Run percentage                                        | 0.98 ± 0.01          | 0.96 ± 0.02    | 0.033 | 0.043 |
|                                 | Long run emphasis                                     | 1.09 ± 0.03          | 1.14 ± 0.07    | 0.036 | 0.043 |
|                                 | Short run emphasis                                    | 0.98 ± 0.01          | 0.97 ± 0.01    | 0.034 | 0.043 |
|                                 | Gray level non uniformity (10 <sup>2</sup> )          | 3.85 ± 1.62          | 5.47 ± 1.86    | 0.017 | 0.043 |
|                                 | Run length non uniformity normalized                  | 0.95 ± 0.01          | 0.93 ± 0.03    | 0.032 | 0.043 |
| Intensity discretized (FBW 42)  | Run entropy                                           | 3.87 ± 0.16          | 4.01 ± 0.19    | 0.027 | 0.043 |
|                                 | Run variance                                          | 0.45 ± 0.21          | 0.84 ± 0.69    | 0.048 | 0.048 |
|                                 | Run percentage                                        | 0.81 ± 0.04          | 0.76 ± 0.08    | 0.032 | 0.043 |
|                                 | Long run emphasis                                     | 2.08 ± 0.43          | 2.83 ± 1.27    | 0.047 | 0.048 |
|                                 | Short run emphasis                                    | 0.86 ± 0.03          | 0.83 ± 0.06    | 0.036 | 0.043 |
|                                 | Short run low gray level emphasis                     | 0.12 ± 0.04          | 0.08 ± 0.05    | 0.039 | 0.043 |
|                                 | Long run high gray level emphasis                     | 60.14 ± 20.19        | 107.98 ± 52.67 | 0.004 | 0.026 |
|                                 | Run length non uniformity normalized                  | 0.70 ± 0.05          | 0.65 ± 0.08    | 0.029 | 0.043 |
| 2 mm $\sigma$ LoG filter        | Run variance                                          | 0.01 ± 0.01          | 0.02 ± 0.01    | 0.041 | 0.043 |
|                                 | Run percentage                                        | 0.99 ± 0.01          | 0.98 ± 0.01    | 0.038 | 0.043 |
|                                 | Short run emphasis                                    | 0.99 ± 0.01          | 0.98 ± 0.01    | 0.039 | 0.043 |
|                                 | Long run emphasis                                     | 1.04 ± 0.02          | 1.05 ± 0.03    | 0.040 | 0.044 |
|                                 | Gray level non uniformity                             | 128.07 ± 53.79       | 211.42 ± 98.13 | 0.007 | 0.030 |

|                  |                                         |                     |                     |       |       |
|------------------|-----------------------------------------|---------------------|---------------------|-------|-------|
|                  | Run length non uniformity<br>normalized | $0.98 \pm 0.01$     | $0.97 \pm 0.02$     | 0.038 | 0.043 |
| Logarithm filter | Run entropy                             | $7.84 \pm 0.27$     | $7.52 \pm 0.34$     | 0.006 | 0.028 |
|                  | Run variance                            | $0.01 \pm 0.01$     | $0.02 \pm 0.01$     | 0.005 | 0.026 |
|                  | Run percentage                          | $0.99 \pm 0.01$     | $0.98 \pm 0.01$     | 0.004 | 0.026 |
|                  | Short run emphasis                      | $0.99 \pm 0.01$     | $0.98 \pm 0.01$     | 0.004 | 0.026 |
|                  | Long run emphasis                       | $1.02 \pm 0.01$     | $1.05 \pm 0.03$     | 0.005 | 0.026 |
|                  | Gray level non uniformity               | $103.59 \pm 42.44$  | $189.86 \pm 79.64$  | 0.001 | 0.026 |
|                  | Gray level non uniformity<br>normalized | $0.0056 \pm 0.0013$ | $0.0077 \pm 0.0022$ | 0.004 | 0.026 |
|                  | Run length non uniformity<br>normalized | $0.99 \pm 0.01$     | $0.97 \pm 0.02$     | 0.004 | 0.026 |

*Footnotes:* Data are presented as mean  $\pm$  standard error. q value represents the minimum false discovery rate at which a result can be considered significant.

*Abbreviations:* FBN, fixed bin number; FBW, fixed bin width; GLRLM, gray level run length matrix.

**Supplementary Table S4.** GLSZM texture features that showed a statistically significant difference between the study groups

| Image type                      | Feature name                                           | Chronic pancreatitis | Health         | p     | q     |
|---------------------------------|--------------------------------------------------------|----------------------|----------------|-------|-------|
| Intensity discretized (FBN 16)  | Zone percentage                                        | 0.15 ± 0.03          | 0.11 ± 0.04    | 0.014 | 0.031 |
|                                 | High gray level zone emphasis                          | 46.09 ± 6.85         | 52.94 ± 7.45   | 0.014 | 0.031 |
|                                 | Low gray level zone emphasis                           | 0.12 ± 0.03          | 0.08 ± 0.03    | 0.005 | 0.023 |
|                                 | Small area high gray level emphasis                    | 24.72 ± 3.61         | 27.91 ± 4.01   | 0.030 | 0.040 |
|                                 | Small area low gray level emphasis                     | 0.06 ± 0.01          | 0.05 ± 0.01    | 0.003 | 0.021 |
|                                 | Large area high gray level emphasis (10 <sup>5</sup> ) | 2.43 ± 4.02          | 8.32 ± 8.29    | 0.022 | 0.033 |
| Intensity discretized (FBN 128) | Zone entropy                                           | 7.33 ± 0.09          | 7.48 ± 0.16    | 0.004 | 0.021 |
|                                 | Zone percentage                                        | 0.78 ± 0.05          | 0.72 ± 0.08    | 0.020 | 0.033 |
|                                 | Small area emphasis                                    | 0.85 ± 0.03          | 0.81 ± 0.04    | 0.016 | 0.033 |
|                                 | Low gray level zone emphasis                           | 0.010 ± 0.004        | 0.007 ± 0.005  | 0.046 | 0.047 |
|                                 | Small area low gray level emphasis                     | 0.008 ± 0.003        | 0.005 ± 0.004  | 0.029 | 0.040 |
|                                 | Size zone non uniformity normalized                    | 0.67 ± 0.04          | 0.63 ± 0.06    | 0.014 | 0.031 |
|                                 | High gray level zone emphasis (10 <sup>2</sup> )       | 26.79 ± 8.29         | 35.32 ± 10.71  | 0.021 | 0.033 |
|                                 | Small area high gray level emphasis (10 <sup>2</sup> ) | 22.54 ± 6.86         | 28.78 ± 7.91   | 0.043 | 0.046 |
|                                 | Large area high gray level emphasis (10 <sup>3</sup> ) | 6.33 ± 2.24          | 13.99 ± 9.79   | 0.010 | 0.031 |
| Intensity discretized (FBW 6)   | Zone entropy                                           | 7.06 ± 0.15          | 7.25 ± 0.19    | 0.006 | 0.025 |
|                                 | Zone percentage                                        | 0.68 ± 0.07          | 0.61 ± 0.11    | 0.030 | 0.040 |
|                                 | Small area emphasis                                    | 0.79 ± 0.04          | 0.76 ± 0.05    | 0.041 | 0.046 |
|                                 | Small area low gray level emphasis                     | 0.02 ± 0.004         | 0.007 ± 0.006  | 0.034 | 0.043 |
|                                 | Size zone non uniformity normalized                    | 0.58 ± 0.05          | 0.54 ± 0.07    | 0.043 | 0.046 |
|                                 | Large area high gray level emphasis (10 <sup>3</sup> ) | 4.66 ± 2.05          | 19.81 ± 24.67  | 0.033 | 0.043 |
| Intensity discretized (FBW 42)  | Zone variance (10 <sup>4</sup> )                       | 1.43 ± 1.25          | 4.12 ± 3.87    | 0.020 | 0.033 |
|                                 | Large area emphasis (10 <sup>3</sup> )                 | 14.44 ± 12.54        | 41.44 ± 38.93  | 0.020 | 0.033 |
|                                 | Low gray level zone emphasis                           | 0.17 ± 0.04          | 0.14 ± 0.04    | 0.018 | 0.033 |
|                                 | Small area low gray level emphasis                     | 0.08 ± 0.02          | 0.06 ± 0.02    | 0.011 | 0.031 |
|                                 | Large area high gray level emphasis (10 <sup>5</sup> ) | 4.04 ± 3.97          | 14.26 ± 9.23   | 0.012 | 0.031 |
| 2 mm $\sigma$ LoG filter        | Zone percentage                                        | 0.87 ± 0.04          | 0.83 ± 0.07    | 0.037 | 0.045 |
|                                 | Large area emphasis                                    | 1.59 ± 0.24          | 1.97 ± 0.64    | 0.048 | 0.048 |
|                                 | Small area emphasis                                    | 0.91 ± 0.03          | 0.89 ± 0.04    | 0.044 | 0.046 |
|                                 | Gray level non uniformity                              | 109.09 ± 46.32       | 162.69 ± 58.67 | 0.010 | 0.031 |
|                                 | Size zone non uniformity normalized                    | 0.79 ± 0.05          | 0.74 ± 0.07    | 0.044 | 0.046 |
|                                 | Zone variance                                          | 0.17 ± 0.07          | 0.42 ± 0.36    | 0.017 | 0.033 |

|                     |                                         |                     |                     |       |       |
|---------------------|-----------------------------------------|---------------------|---------------------|-------|-------|
| Logarithm<br>filter | Zone percentage                         | $0.89 \pm 0.026$    | $0.84 \pm 0.067$    | 0.004 | 0.021 |
|                     | Small area emphasis                     | $0.93 \pm 0.02$     | $0.89 \pm 0.04$     | 0.003 | 0.021 |
|                     | Large area emphasis                     | $1.41 \pm 0.14$     | $1.86 \pm 0.59$     | 0.011 | 0.031 |
|                     | Gray level non uniformity               | $89.74 \pm 35.62$   | $146.02 \pm 50.05$  | 0.001 | 0.021 |
|                     | Size zone non uniformity<br>normalized  | $0.84 \pm 0.034$    | $0.76 \pm 0.076$    | 0.003 | 0.021 |
|                     | Gray level non uniformity<br>normalized | $0.0054 \pm 0.0010$ | $0.0071 \pm 0.0019$ | 0.004 | 0.021 |

*Footnotes:* Data are presented as mean  $\pm$  standard error. q value represents the minimum false discovery rate at which a result can be considered significant.

*Abbreviations:* FBN, fixed bin number; FBW, fixed bin width; GLSZM, gray level size zone matrix.

**Supplementary Table S5.** GLDM texture features that showed a statistically significant difference between the study groups

| Image type                      | Feature name                                                 | Chronic pancreatitis | Health          | p     | q     |
|---------------------------------|--------------------------------------------------------------|----------------------|-----------------|-------|-------|
| Intensity discretized (FBN 16)  | Dependence entropy                                           | 6.59 ± 0.14          | 6.79 ± 0.23     | 0.009 | 0.027 |
|                                 | Dependence variance                                          | 7.92 ± 3.65          | 12.79 ± 6.84    | 0.024 | 0.042 |
|                                 | High gray level emphasis                                     | 47.74 ± 14.81        | 62.41 ± 19.06   | 0.026 | 0.042 |
|                                 | Low gray level emphasis                                      | 0.09 ± 0.04          | 0.06 ± 0.05     | 0.038 | 0.042 |
|                                 | Small dependence emphasis                                    | 0.15 ± 0.03          | 0.12 ± 0.04     | 0.018 | 0.035 |
|                                 | Large dependence emphasis                                    | 32.59 ± 14.31        | 50.03 ± 25.03   | 0.028 | 0.042 |
|                                 | Dependence non uniformity normalized                         | 0.12 ± 0.01          | 0.09 ± 0.03     | 0.011 | 0.031 |
|                                 | Small dependence low gray level emphasis                     | 0.02 ± 0.003         | 0.01 ± 0.005    | 0.005 | 0.019 |
|                                 | Large dependence high gray level emphasis (10 <sup>2</sup> ) | 15.83 ± 6.68         | 34.13 ± 20.22   | 0.004 | 0.019 |
|                                 |                                                              |                      |                 |       |       |
| Intensity discretized (FBN 128) | Dependence entropy                                           | 7.67 ± 0.11          | 7.82 ± 0.17     | 0.009 | 0.027 |
|                                 | Dependence variance                                          | 0.61 ± 0.19          | 0.88 ± 0.43     | 0.030 | 0.042 |
|                                 | Small dependence emphasis                                    | 0.71 ± 0.05          | 0.64 ± 0.08     | 0.017 | 0.034 |
|                                 | Large dependence emphasis                                    | 2.92 ± 0.62          | 3.79 ± 1.29     | 0.029 | 0.042 |
|                                 | High gray level emphasis (10 <sup>2</sup> )                  | 27.07 ± 8.87         | 35.87 ± 11.45   | 0.026 | 0.042 |
|                                 | Dependence non uniformity normalized                         | 0.48 ± 0.05          | 0.41 ± 0.08     | 0.014 | 0.032 |
|                                 | Small dependence low gray level emphasis                     | 0.007 ± 0.003        | 0.005 ± 0.004   | 0.043 | 0.044 |
|                                 | Large dependence high gray level emphasis (10 <sup>3</sup> ) | 7.95 ± 2.93          | 14.31 ± 7.13    | 0.005 | 0.019 |
| Intensity discretized (FBW 6)   | Dependence entropy                                           | 7.41 ± 0.15          | 7.59 ± 0.19     | 0.013 | 0.032 |
|                                 | Dependence variance                                          | 0.96 ± 0.31          | 1.49 ± 0.88     | 0.037 | 0.042 |
|                                 | Small dependence emphasis                                    | 0.60 ± 0.06          | 0.54 ± 0.09     | 0.032 | 0.042 |
|                                 | Large dependence emphasis                                    | 4.13 ± 0.99          | 5.82 ± 2.73     | 0.037 | 0.042 |
|                                 | Gray level non uniformity (10 <sup>2</sup> )                 | 3.99 ± 1.68          | 5.79 ± 2.05     | 0.014 | 0.031 |
|                                 | Dependence non uniformity normalized                         | 0.38 ± 0.05          | 0.32 ± 0.08     | 0.030 | 0.042 |
|                                 | Small dependence low gray level emphasis                     | 0.009 ± 0.003        | 0.006 ± 0.004   | 0.042 | 0.044 |
|                                 | Large dependence high gray level emphasis (10 <sup>3</sup> ) | 5.06 ± 1.95          | 9.67 ± 4.94     | 0.003 | 0.019 |
| Intensity discretized (FBW 42)  | Dependence entropy                                           | 6.46 ± 0.16          | 6.64 ± 0.21     | 0.014 | 0.031 |
|                                 | Dependence variance                                          | 11.39 ± 4.57         | 17.89 ± 9.85    | 0.031 | 0.042 |
|                                 | Large dependence emphasis                                    | 48.25 ± 17.59        | 73.93 ± 39.56   | 0.033 | 0.042 |
|                                 | Gray level non uniformity (10 <sup>3</sup> )                 | 2.76 ± 1.16          | 3.97 ± 1.39     | 0.015 | 0.032 |
|                                 | Dependence non uniformity normalized                         | 0.09 ± 0.02          | 0.08 ± 0.03     | 0.024 | 0.042 |
|                                 | Small dependence low gray level emphasis                     | 0.014 ± 0.003        | 0.009 ± 0.005   | 0.001 | 0.019 |
|                                 | Large dependence high gray level emphasis (10 <sup>2</sup> ) | 14.12 ± 5.74         | 29.37 ± 16.18   | 0.003 | 0.019 |
|                                 |                                                              |                      |                 |       |       |
| 2 mm $\sigma$ LoG filter        | Dependence variance                                          | 0.33 ± 0.11          | 0.49 ± 0.25     | 0.036 | 0.042 |
|                                 | Gray level non uniformity                                    | 129.82 ± 54.48       | 216.32 ± 102.67 | 0.007 | 0.025 |



|                             |                                         |                    |                    |       |       |
|-----------------------------|-----------------------------------------|--------------------|--------------------|-------|-------|
|                             | Large dependence emphasis               | $2.01 \pm 0.32$    | $2.45 \pm 0.71$    | 0.039 | 0.042 |
|                             | Small dependence emphasis               | $0.82 \pm 0.05$    | $0.77 \pm 0.08$    | 0.039 | 0.042 |
|                             | Dependence non uniformity<br>normalized | $0.63 \pm 0.07$    | $0.56 \pm 0.09$    | 0.038 | 0.042 |
| 5 mm $\sigma$ LoG<br>filter | Gray level non uniformity               | $191.94 \pm 87.54$ | $261.16 \pm 96.38$ | 0.049 | 0.049 |
|                             | Dependence variance                     | $0.24 \pm 0.08$    | $0.43 \pm 0.23$    | 0.005 | 0.019 |
|                             | Gray level non uniformity               | $104.87 \pm 43.12$ | $194.23 \pm 82.86$ | 0.001 | 0.019 |
| Logarithm<br>filter         | Large dependence emphasis               | $1.72 \pm 0.22$    | $2.31 \pm 0.68$    | 0.005 | 0.019 |
|                             | Small dependence emphasis               | $0.86 \pm 0.04$    | $0.79 \pm 0.08$    | 0.003 | 0.019 |
|                             | Dependence non uniformity<br>normalized | $0.69 \pm 0.06$    | $0.59 \pm 0.12$    | 0.003 | 0.019 |

*Footnotes:* Data are presented as mean  $\pm$  standard error. q value represents the minimum false discovery rate at which a result can be considered significant.

*Abbreviations:* FBN, fixed bin number; FBW, fixed bin width; GLDM, gray level dependence matrix.

**Supplementary Table S6.** NGTDM texture features that showed a statistically significant difference between the study groups

| <b>Image type</b>               | <b>Feature name</b> | <b>Chronic pancreatitis</b> | <b>Health</b>     | <b>p</b> | <b>q</b> |
|---------------------------------|---------------------|-----------------------------|-------------------|----------|----------|
| Intensity discretized (FBN 16)  | Complexity          | 168.94 ± 21.13              | 138.45 ± 39.43    | 0.015    | 0.032    |
| Intensity discretized (FBN 128) | Contrast            | 0.75 ± 0.23                 | 0.56 ± 0.23       | 0.032    | 0.032    |
| 2 mm $\sigma$ LoG filter        | Contrast            | 1.24 ± 0.48                 | 0.84 ± 0.42       | 0.021    | 0.032    |
| 5 mm $\sigma$ LoG filter        | Coarseness          | 0.00075 ± 0.00034           | 0.00051 ± 0.00015 | 0.025    | 0.032    |

*Footnotes:* Data are presented as mean ± standard error. q value represents the minimum false discovery rate at which a result can be considered significant.

*Abbreviations:* FBN, fixed bin number; NGTDM, neighbouring gray tone difference matrix.
